# Supplementary material
Source: MDPI journal article supplement (https://www.mdpi.com/2073-4441/12/4/1085)
Supplement: s1 [file s1]

# Microplastics Removal from Treated Wastewater by a Biofilter

Fan Liu, Nadia B Nord, Kai Bester and Jes Vollertsen

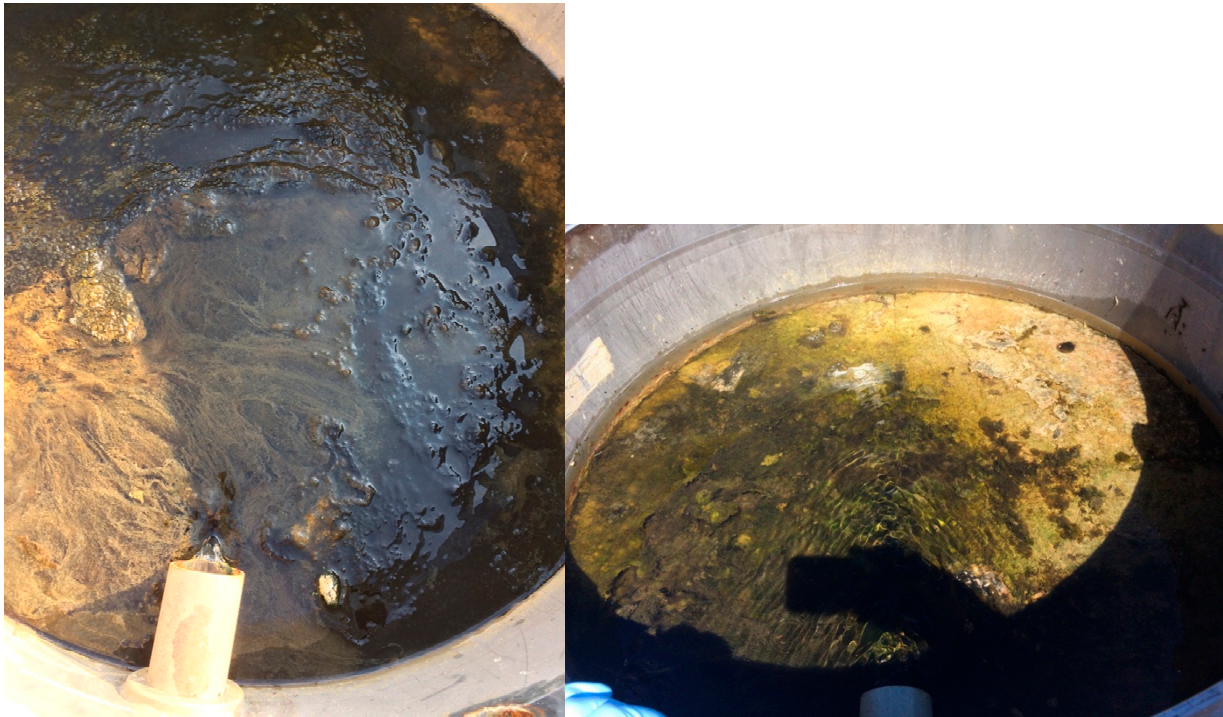

**Figure S1.** Biofilm growth, photo taken from the top of the filter before the sampling.

**Table S1.** Sample volume, MP concentration, removal efficiency, particle size, and mass for the inlet (raw effluent without passing through the biofilter and each filtration level).

|         | Sampled volume (L) | Particle identified (item) | Median particle size (μm) | Median particle mass (ng) | Number concentration (item m <sup>-3</sup> ) | Removal efficiency (%) | Mass concentration (μg m <sup>-3</sup> ) | Removal efficiency (%) |
|---------|--------------------|----------------------------|---------------------------|---------------------------|----------------------------------------------|------------------------|------------------------------------------|------------------------|
| Inlet   | 509                | 84                         | 42.6                      | 4.2                       | 916.8                                        |                        | 24.8                                     |                        |
| Level 1 | 811                | 34                         | 41.6                      | 3.9                       | 232.9                                        | 74.6                   | 2.6                                      | 89.5                   |
| Level 2 | 650                | 13                         | 45.5                      | 10.8                      | 111.1                                        | 87.9                   | 1.5                                      | 93.9                   |
| Level 3 | 995                | 44                         | 33.5                      | 3.2                       | 245.7                                        | 73.2                   | 4.9                                      | 80.2                   |
| Level 4 | 780                | 24                         | 30.1                      | 1.8                       | 170.9                                        | 81.4                   | 1.1                                      | 95.6                   |

**Table S2.** MP concentration and removal efficiency when the four treatment levels are combined.

|          | Sampled volume (L) | Particle identified (item) | Median particle size (μm) | Median particle mass (ng) | Number concentration (item m <sup>-3</sup> ) | Removal efficiency (%) | Mass concentration (μg m <sup>-3</sup> ) | Removal efficiency (%) |
|----------|--------------------|----------------------------|---------------------------|---------------------------|----------------------------------------------|------------------------|------------------------------------------|------------------------|
| Inlet    | 509                | 84                         | 42.6                      | 4.2                       | 916.8                                        |                        | 24.8                                     |                        |
| Combined | 3236               | 115                        | 39.0                      | 3.3                       | 197.4                                        | 78.5                   | 2.8                                      | 88.9                   |
